# Supplementary material for: Oestrogen-dependent hypothalamic oxytocin expression with changes in feeding and body weight in female rats
Source: PubMed Central journal article supplement (PMC9445083; doi:10.1038/s42003-022-03889-6), 2022-09-05
Supplement: 42003_2022_3889_MOESM2_ESM.pdf [file 42003_2022_3889_MOESM2_ESM.pdf]

## **Description of Additional Supplementary Files**

**File name:** Supplementary Data 1

**Description:** The source data behind the graphs in the paper.
